# Supplementary material for: BRCA1 secondary splice-site mutations drive exon-skipping and PARP inhibitor resistance
Source: PubMed Central journal article supplement — Mol Cancer. 2024 Aug 5;23:158. doi: 10.1186/s12943-024-02048-1 (PMC11299415; doi:10.1186/s12943-024-02048-1), 2024-08-05

# **BRCA1 secondary splice-site mutations drive exon-skipping and PARP inhibitor resistance**

Nesic et al.,

**Uncropped blots and gels**

Figure 1F- BRCA1

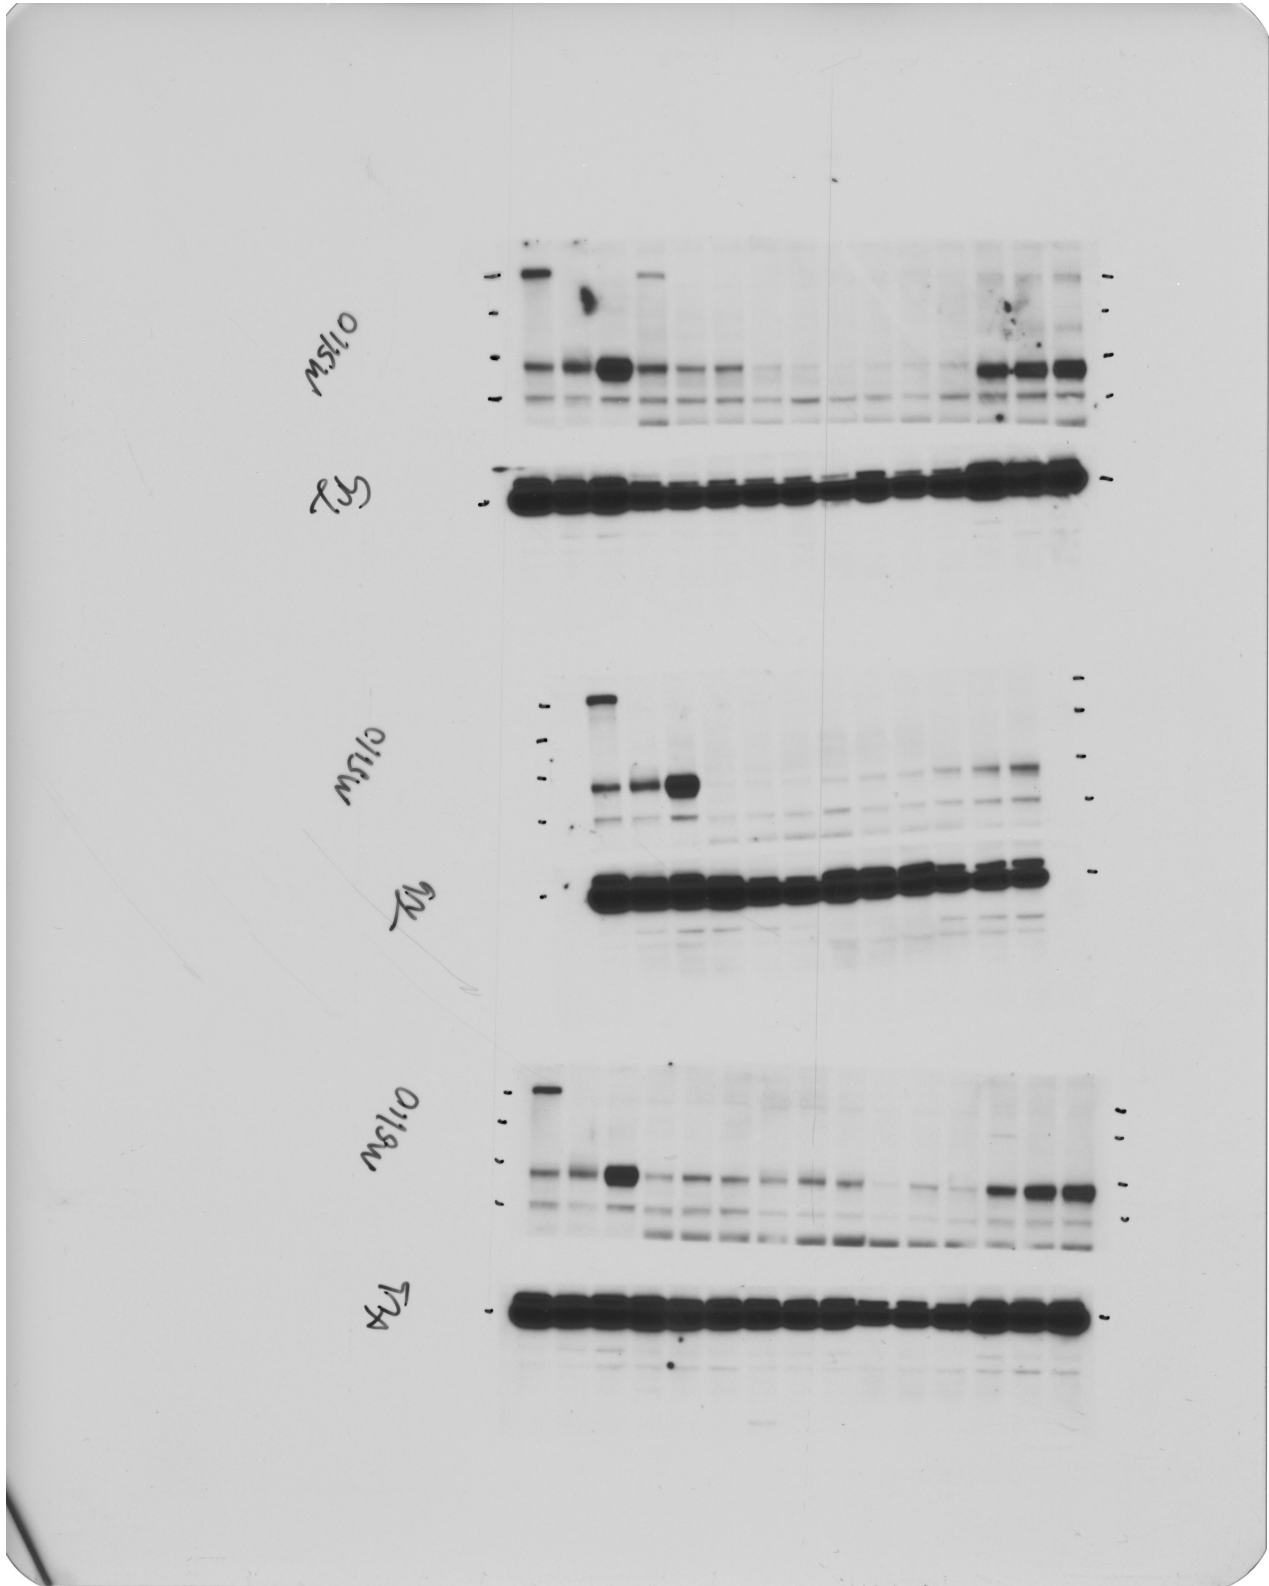

Figure 1F- Tubulin

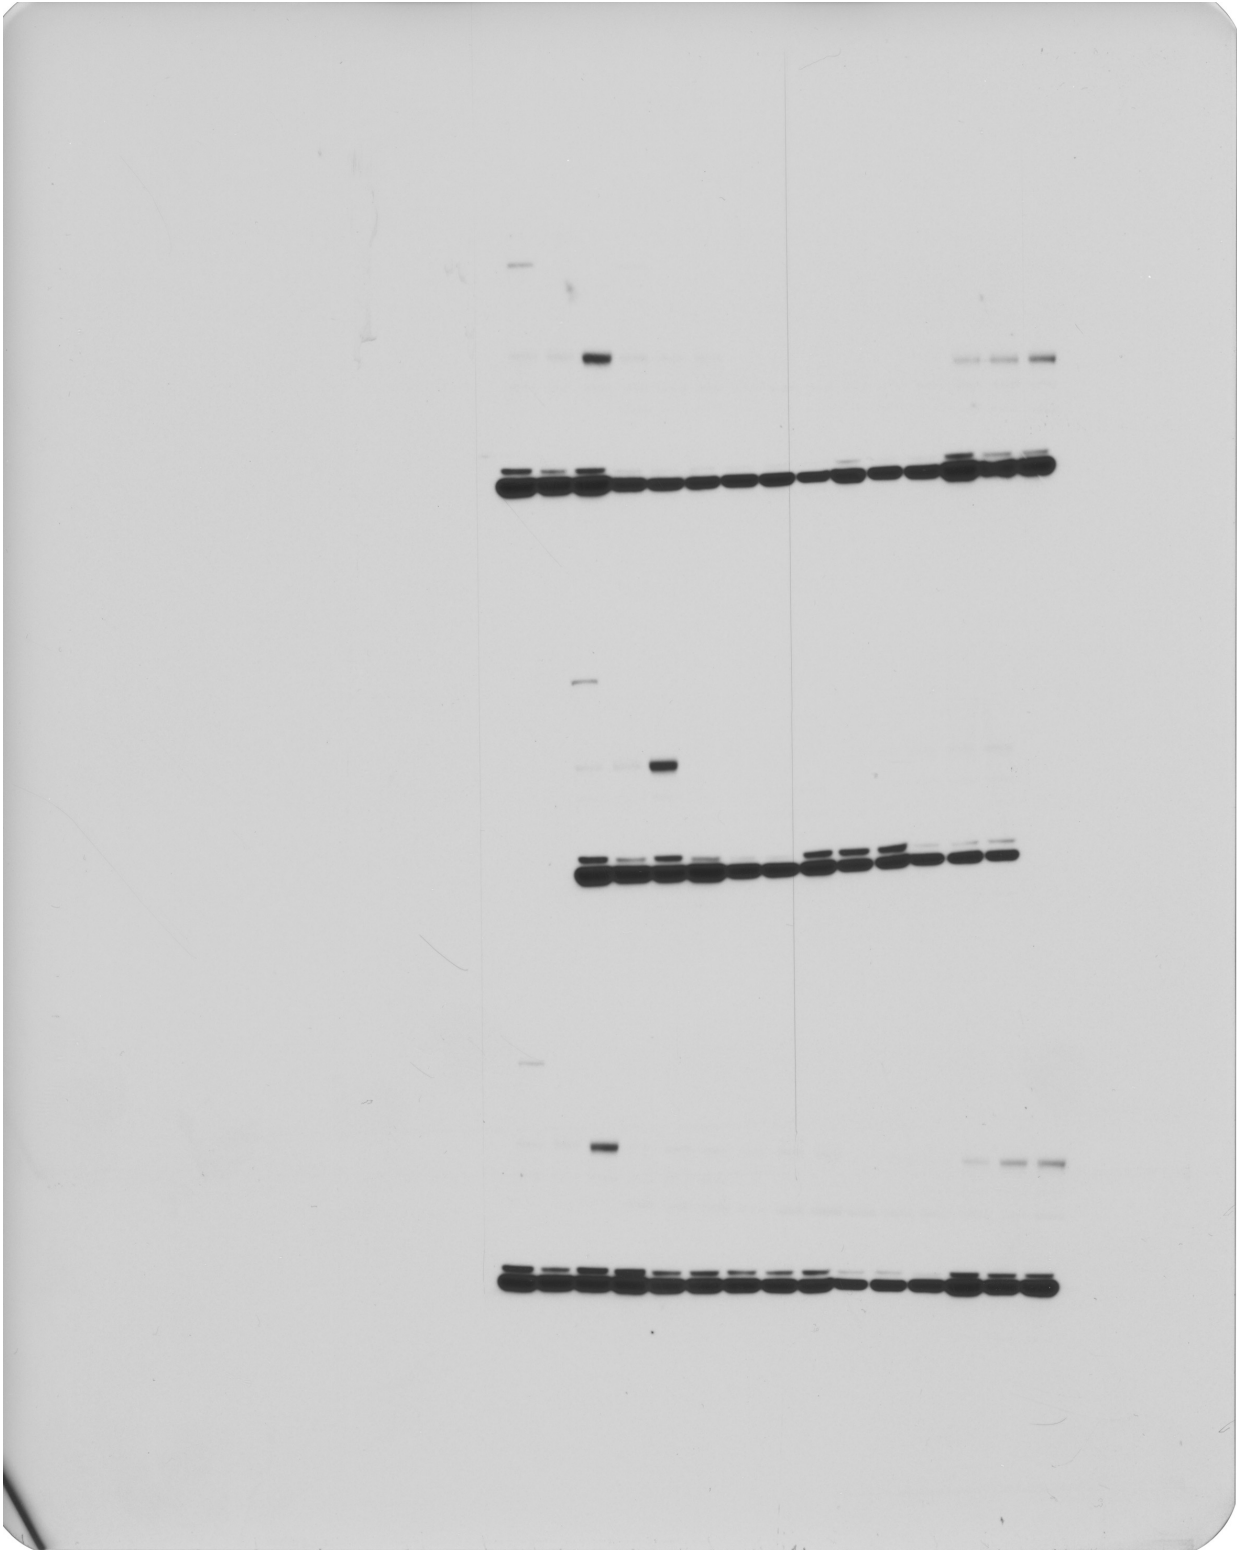

Figure 1H- HA-Tag and Tubulin

PDX SAMPLES

12/9/21

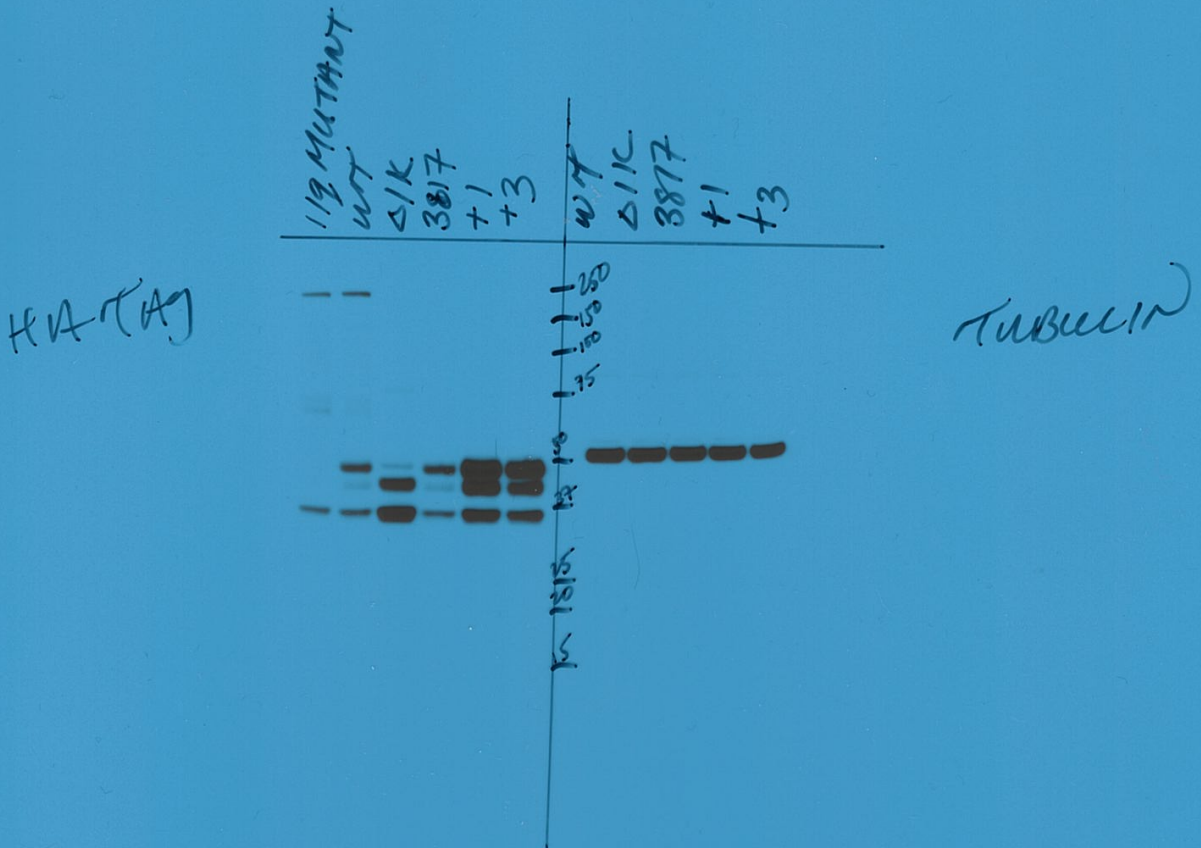

500

①





Figure 1I- Tubulin

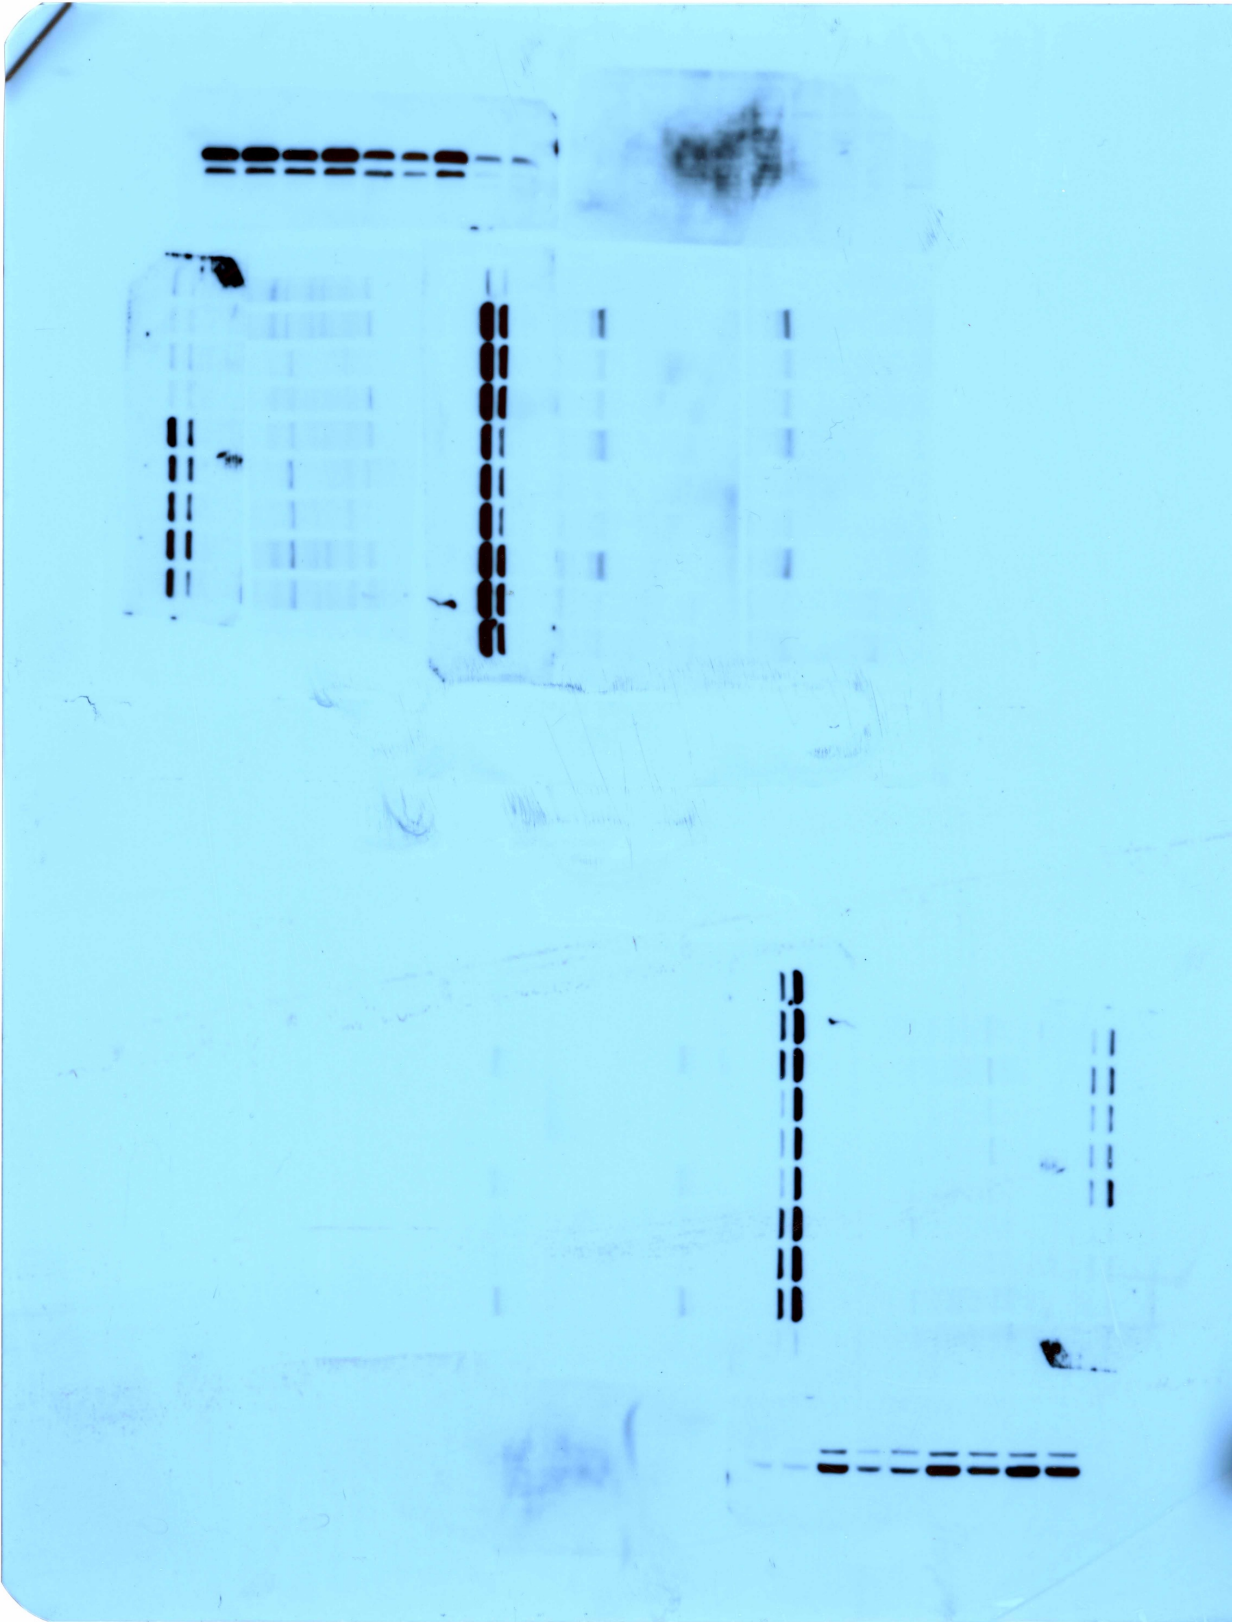

Supplement: 12943_2024_2048_MOESM4_ESM.pdf [file 12943_2024_2048_MOESM4_ESM.pdf]
